# Supplementary material
Source: Springer Nature journal article supplement (https://www.springermedizin.de/resource/supplementary/12885_2007_981_MOESM2_ESM.pdf/9471822)

**Additional Table 2 Antibody list**

| Protein Name                                                 | Antibody               | Dilution factor | Clone                 | *Supplier / Cat # / Applications | Antibody performance references                                                                        |
|--------------------------------------------------------------|------------------------|-----------------|-----------------------|----------------------------------|--------------------------------------------------------------------------------------------------------|
| a disintegrin and metalloproteinase domain 9                 | ADAM9                  | 400             | Goat/Pc               | R&D Systems / AF949 / IHC        | Grutzmann R. Br J Cancer.2004;90(5):1053-8.                                                            |
| βcatenin                                                     | βCAT                   | 300             | Mc, clone 14          | BD / 610153 / IHC                | §Al-Aynati MM. Clin Cancer Res.2004; 10(4):1235-40                                                     |
| phospho-βcatenin, targeted for degradation (T41/S45)         | p-βCAT                 | 50              | Rb/Pc                 | CST / 9565 / IHC                 | Western blot shown on product datasheet                                                                |
| cytokeratin 7                                                | CK7                    | 2000            | Mc, clone OV-TL 12/30 | Dako / M7018 / IHC               |                                                                                                        |
| epidermal growth factor receptor                             | EGFR                   | 50              | Mc, clone 31G7        | Zymed / 28-8763                  | §Agulnik M. J Clin Oncol.2007;25(25):3978-84.                                                          |
| phospho-mitogen activated protein kinase, ERK1/2 (T202/Y204) | p-ERK                  | 100             | Rb/Mc, clone 20G11    | CST / 4376 / IHC preferred       | §Agulnik M. J Clin Oncol.2007;25(16):2184-2190.<br>§§Western blot                                      |
| phospho-glycogen synthase kinase 3β (S9), inhibited          | p-GSK3β                | 500             | Rb/Pc                 | CST / 9336 / IHC                 | §Al-Aynati MM. Clin Cancer Res.2004; 10(4):1235-40<br>§Pham NA. Pancreas. 2007;35(3):e16-e26.          |
| phospho-c-jun NH2-terminal kinase (T183/Y185)                | p-JNK                  | 50              | Mc                    | BD / 612540 / W                  | Western blot shown on product datasheet                                                                |
| met proto-oncogene / hepatocyte growth factor receptor       | MET                    | 200             | Mc, clone DL-21       | Upstate / 05-238                 | Kong-Beltran M. Cancer Res.2006;66:283-289.                                                            |
| nuclear factor-κB/ p65, phosphorylated (S276)                | p-NFκB                 | 100             | Rb/Pc                 | CST / 3037 / IHC                 | §Agulnik M. J Clin Oncol.2007;25(16):2184-2190.<br>§Schwock J. Diagn Mol Pathol.2007;16(3):130-140.    |
| phospho-p38 mitogen activated protein kinase (T180/Y182)     | p-p38                  | 200             | Rb/Mc                 | CST / 4631 / IHC specific        | §§Western blot                                                                                         |
| protein kinase B β/Akt2                                      | PKBβ                   | 300             | Rb/Mc                 | CST / 4057 / IHC specific        | §Pham NA. Pancreas. 2007;35(3):e16-e26.                                                                |
| phospho-protein kinase B / Akt                               | S473 <sub>p</sub> -PKB | 100             | Rb/Mc                 | CST/ 3787 / IHC specific         | §§Western blot                                                                                         |
|                                                              | T308 <sub>p</sub> -PKB | 200             | Rb/Pc                 | CST / 9275 / W                   | §Paraffin cell blocks, serum starved/ stimulated, in-house.<br>§Pham NA. Pancreas. 2007;35(3):e16-e26. |
| phosphatase and tensin homolog                               | PTEN                   | 500             | Rb/Mc                 | CST / 9559 / IHC                 | §Duran I. Br J Cancer.2006;95(9):1148-                                                                 |

|                                                            |                         |     |              |                    |                                                                                                                      |
|------------------------------------------------------------|-------------------------|-----|--------------|--------------------|----------------------------------------------------------------------------------------------------------------------|
|                                                            |                         |     |              |                    | 54.                                                                                                                  |
| phospho-cRaf-1 (S259), inhibited                           | p-RAF                   | 200 | Rb/Pc        | CST / 9421 / W     | Western blot shown on product datasheet                                                                              |
| phospho-mammalian target of rapamycin (S2448)              | p-mTOR                  | 400 | Rb/Pc        | CST / 2971 / W     | <sup>§</sup> Duran I. Br J Cancer.2006;95(9):1148-54.                                                                |
| phospho-ribosomal protein p70/S6 kinase (T389)             | p-S6K                   | 100 | M, clone 1A5 | CST / 9206         | Riemenschneider MJ. Cancer Res.2006; 66(11):5618-23.<br><sup>§</sup> Yau CYF. Can Res.2005;65(4):1497-1504.          |
| phospho-ribosomal protein S6 (S235/236)                    | p-S6                    | 200 | Rb/Pc        | CST / 2211 / IHC   | <sup>§</sup> Duran I. Br J Cancer.2006;95(9):1148-54.<br><sup>§</sup> Birle DC. Mol Cancer Ther.2006;5(10):2494-502. |
| mothers against decapentaplegic homolog 4                  | SMAD4                   | 100 | M            | SC / sc-7966 / IHC | <sup>§</sup> Qian J. Can Res.2005;65(12):5045-5053.                                                                  |
| v-src sarcoma viral oncogene homolog                       | SRC                     | 25  | M            | Upstate / 05-184   | <sup>§§</sup> Western blot                                                                                           |
| phospho-src (Y416/Y419), autophosphorylated site           | p-SRC                   | 50  | Rb/Pc        | CST / 2101         | <sup>§§</sup> Western blot                                                                                           |
| phospho-signal transducer and activator of transcription 3 | <sup>S727</sup> p-STAT3 | 200 | M            | BD / 612542 / IF   | <sup>§</sup> Pham NA. Diagn Pathol.2007;2:8-17.                                                                      |
|                                                            | <sup>Y705</sup> p-STAT3 | 100 |              | BD / 612356 / IC   | <sup>§</sup> Schwock J. Diagn Mol Pathol.2007;16(3):130-140.                                                         |

Abbreviations: Rb, rabbit; M, mouse; Pc, polyclonal; Mc, monoclonal.

\*Supplier: R&D Systems, Minneapolis, MN; Cell Signaling Technology (CST), Danvers, MA; Dako, Mississauga ON; BD Biosciences (BD), Mississauga, ON; Santa Cruz Biotechnology (SC), Santa Cruz, CA; Upstate, Charlottesville, VA and Zymed Laboratories, San Francisco, CA. Applications: supplier tested applications include immunohistochemistry, IHC; immunofluorescence, IF; immunocytochemistry, IC and Western blotting, W. <sup>§</sup>Performance of the antibodies have been tested in our laboratory for IHC, IF and Western blotting on samples derived from clinical specimens, tumor xenografts and cell cultures. <sup>§§</sup>Western blots are shown below from data in our laboratory not yet published.

§§ (Additional Table 2) Western blots from data in our laboratory not yet published.  
Arrow indicates detection of specific protein band.

p-ERK (42, 44 kDa)      p-p38 (43 kDa)  
pancreas tumor xenografts      pancreas cancer cell lines

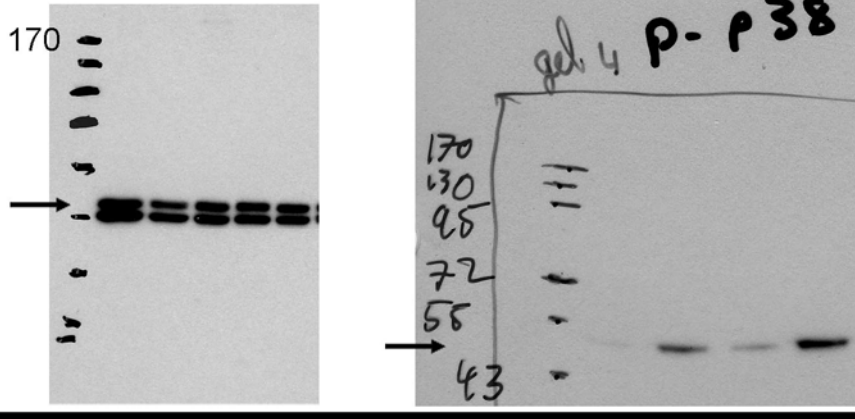

pancreas tumor xenografts

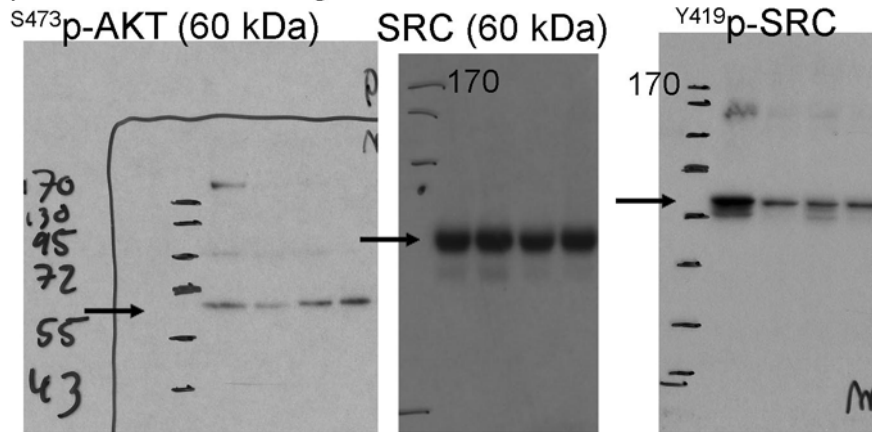

Supplement: MOESM2 [file 9471822]
